# Supplementary material for: Mortality during 6 years of follow-up in relation to visual impairment and eye disease: results from a population-based cohort study of people aged 50 years and above in Nakuru, Kenya
Source: PubMed Central journal article supplement (PMC6561440; doi:10.1136/bmjopen-2019-029700), 2019-06-09
Supplement: bmjopen-2019-029700supp001.pdf [file bmjopen-2019-029700supp001.pdf]

**Web Table 1. 6-Year adjusted mortality risk by level of VI among the Nakuru Eye Disease Cohort Study Participants, stratified by age and gender (Unweighted)**

|                                                          | Overall    |                             | Male       |                             | Female     |                             | <60 years |                             | ≥60 years  |                             |
|----------------------------------------------------------|------------|-----------------------------|------------|-----------------------------|------------|-----------------------------|-----------|-----------------------------|------------|-----------------------------|
|                                                          | N          | Risk per 1,000/6yrs (95%CI) | N          | Risk per 1,000/6yrs (95%CI) | N          | Risk per 1,000/6yrs (95%CI) | N         | Risk per 1,000/6yrs (95%CI) | N          | Risk per 1,000/6yrs (95%CI) |
| <i>Visual acuity at baseline (better eye presenting)</i> |            |                             |            |                             |            |                             |           |                             |            |                             |
| All individuals                                          | 409 / 3441 | 119(106,134)                | 236 / 1656 | 143(124,164)                | 173 / 1785 | 97(83,113)                  | 86 / 1503 | 57(46,71)                   | 323 / 1938 | 167(150,185)                |
| Normal (≥6/12)                                           | 280 / 2901 | 97(84,111)                  | 162 / 1378 | 118(98,140)                 | 118 / 1523 | 78(64,93)                   | 78 / 1420 | 55(44,69)                   | 202 / 1481 | 136(118,157)                |
| Near Normal (<6/12-≥6/18)                                | 27 / 170   | 159(109,226)                | 14 / 84    | 167(104,256)                | 13 / 86    | 151(87,250)                 | 3 / 27    | 111(34,309)                 | 24 / 143   | 168(115,238)                |
| VI (<6/18-≥6/60)                                         | 77 / 275   | 280(234,331)                | 45 / 142   | 317(252,390)                | 32 / 133   | 241(172,325)                | 3 / 31    | 97(30,268)                  | 74 / 244   | 303(250,363)                |
| SVI (<6/60-≥3/60)                                        | 4 / 16     | 250(83,552)                 | 2 / 10     | 200(37,622)                 | 2 / 6      | 333(42,851)                 | 2 / 2     | -                           | 2 / 14     | 143(28,490)                 |
| Blind (<3/60)                                            | 19 / 50    | 380(242,541)                | 13 / 30    | 433(246,642)                | 6 / 20     | 300(129,553)                | 0 / 6     | -                           | 19 / 44    | 433(275,604)                |
| Any VI (<6/18)                                           | 100 / 341  | 293(245,347)                | 60 / 182   | 330(268,398)                | 40 / 159   | 252(184,333)                | 5 / 39    | 128(52,281)                 | 95 / 302   | 315(260,375)                |
